# Supplementary material for: Assembly of copper–tetrazole frameworks with role-changeable Keggin clusters: syntheses, structures, solvent-dependent luminescence and electrochemistry properties
Source: Royal Society of Chemistry journal article supplement (doi:10.1039/c3ce41008k), 2013-01-01

Supplemental Material for:

**Assembly of Copper–Tetrazole Frameworks with Role-Changeable Keggin Clusters: Syntheses, Structures, Solvent-Dependent Luminescence and Electrochemistry Properties**

Zhen-yu Shi,<sup>ab</sup> Zhe-yu Zhang,<sup>a</sup> Jun Peng,<sup>\*</sup> Xia Yu<sup>a</sup> and Xiang Wang<sup>a</sup>

**Scheme S1** View of the coordination modes of HL ligands in compound **2**.

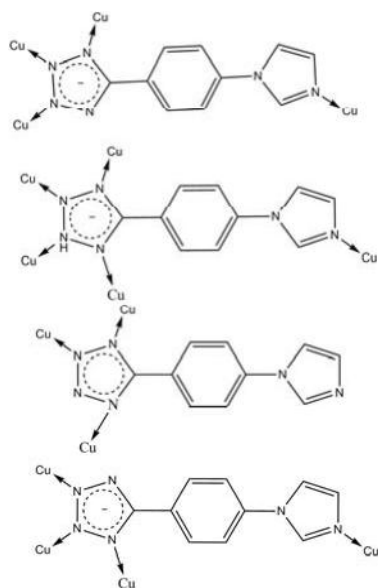

Fig. S1 (a) View of the 2D layers linked into a 3D framework through supramolecular interactions. (b) View of the compacted aromatic stacking interactions in compound **1**. All hydrogen atoms are omitted for clarity.

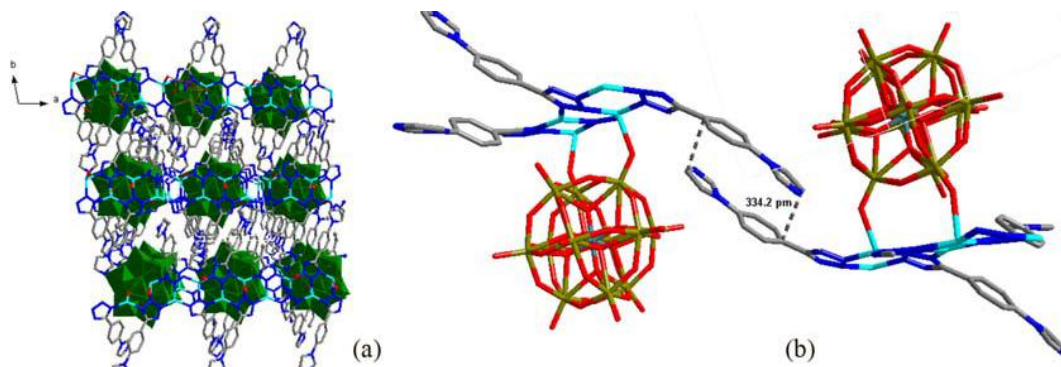

Fig. S2 View of the variable coordination modes of HL ligands in compound **2**.

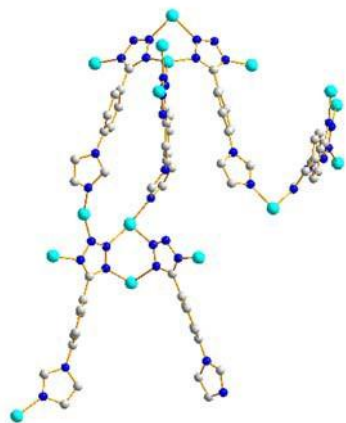

Fig. S3 View of  $\{\text{Cu}_4\}^{4+}$  cluster in compound **2**.

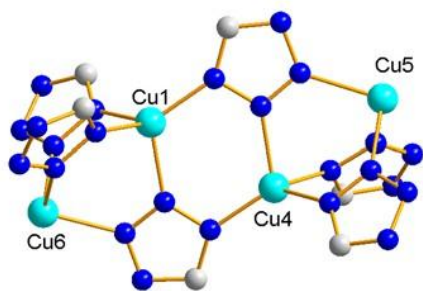

Fig. S4 IR spectra of compounds **1** and **2**.

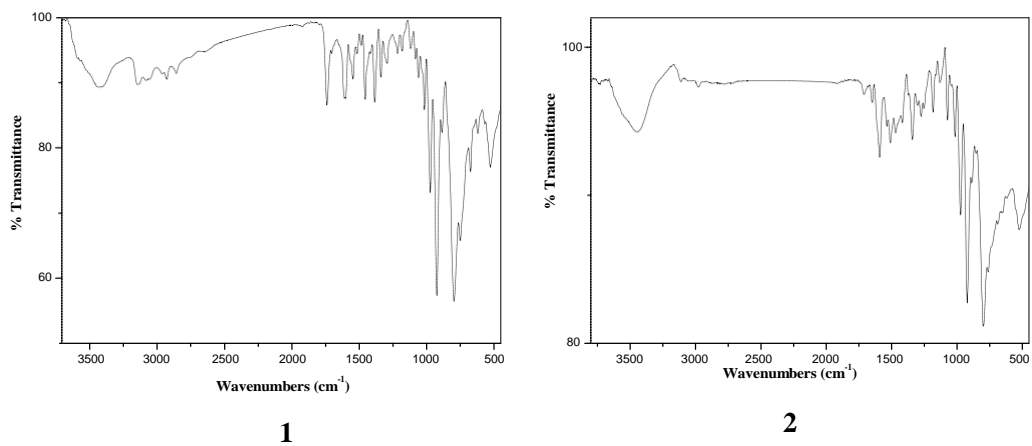

Fig. S5 TG curves of compounds **1** and **2**.

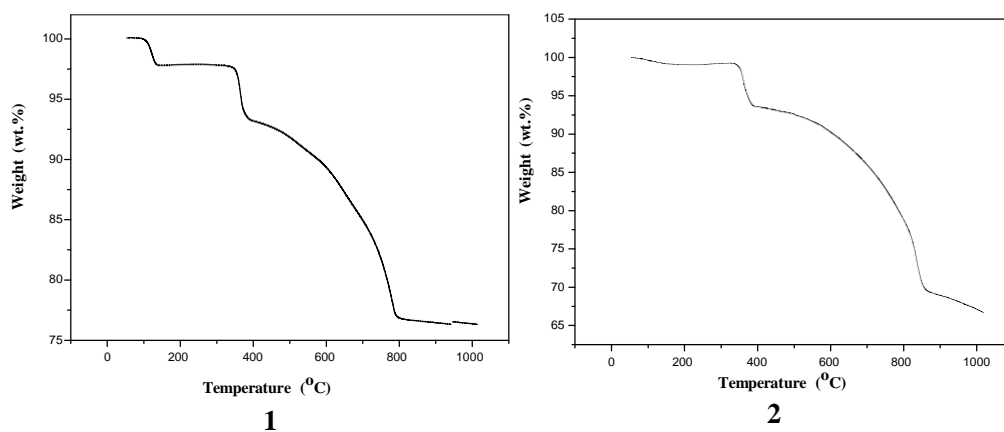

Fig. S6 PXRD patterns of compounds **1** and **2**: a) simulated from single-crystal data, b) as-synthesized sample, (c) heated at 180 °C for 12 h.

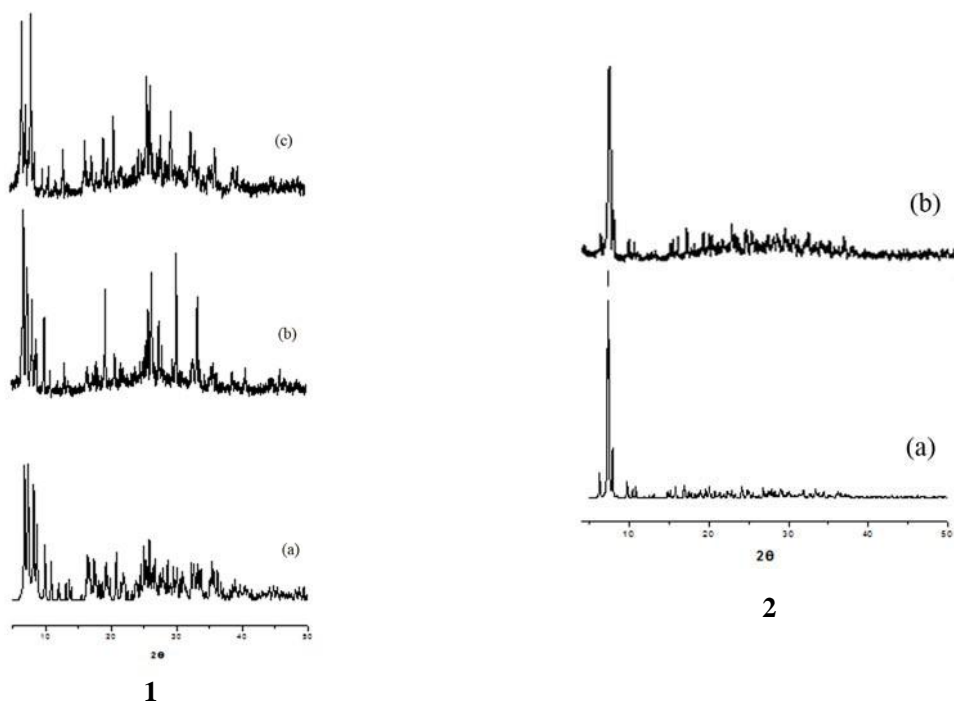

Fig. S7 Solid-state emission spectra of HL ligand, compounds **1** and **2**.

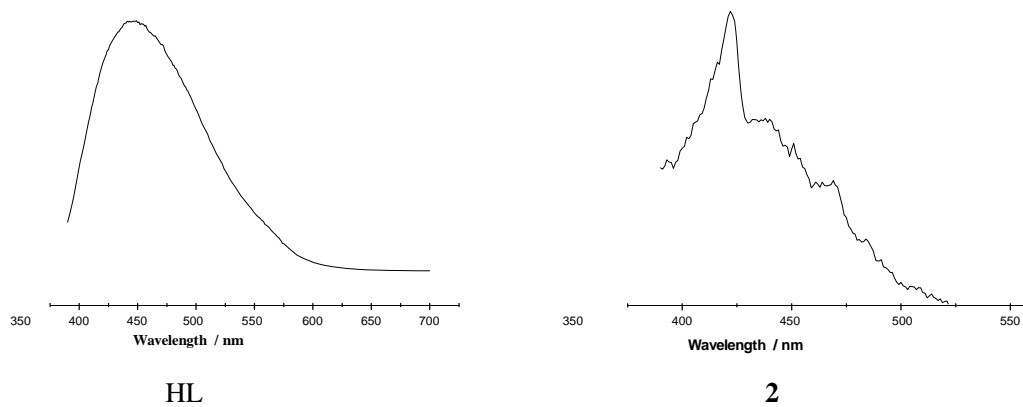

Supplement: c3ce41008k.pdf [file c3ce41008k.pdf]
